# Supplementary material for: Target-responsive vasoactive probes for ultrasensitive molecular imaging
Source: PubMed Central journal article supplement (PMC7220906; doi:10.1038/s41467-020-16118-7), 2020-05-13
Supplement: 41467_2020_16118_MOESM1_ESM.pdf [file 41467_2020_16118_MOESM1_ESM.pdf]

# Target-responsive vasoactive probes for ultrasensitive molecular imaging

Robert Ohlendorf\*, Agata Wiśniowska\*, Mitul Desai, Ali Barandov,  
Adrian L. Slusarczyk, Nan Li & Alan Jasanoff

## Supplementary Information

| <b>Table of Contents</b>                                                                | <b>Page</b> |
|-----------------------------------------------------------------------------------------|-------------|
| Supplementary Methods                                                                   | 2           |
| Supplementary Table 1   PAC1 activation by PACAP variants                               | 3           |
| Supplementary Figure 1   MRI signal changes arising from intracranial PACAP delivery    | 4           |
| Supplementary Figure 2   MRI signal changes arising from tandem PACAP injections        | 5           |
| Supplementary Figure 3   Comparison of vasoprobe and sensory-induced MRI signal changes | 6           |
| Supplementary Figure 4   Use of desthiobiotin for BT-AVATar construction                | 7           |
| Supplementary Figure 5   BT-AVATar variant containing one tethered dBT                  | 8           |
| Supplementary Figure 6   Biotin-labeled and control cells for implantation              | 9           |
| Supplementary Figure 7   Quantification of streptavidin binding by biotinylated cells   | 10          |
| Supplementary Figure 8   Synthesis of PACAP-10,20-DA                                    | 11          |
| Supplementary Figure 9   NMR spectra of DA-Mal                                          | 12          |
| Supplementary Figure 10   Model of DA-AVATar design parameter effects                   | 13          |
| Supplementary Figure 11   DA-AVATar variant containing three tethered dopamine moieties | 14          |

## SUPPLEMENTARY METHODS

### General synthesis-related information

Mal-NHS (**1**) was purchased from Matrix Scientific (Columbia, SC) and used without further purification. All other chemicals were purchased from Sigma-Aldrich. Mass spectra were recorded on Agilent (Santa Clara, CA) 6545 Q-TOF and Bruker (Billerica, MA) Omnix MALDI-TOF instruments. Nuclear magnetic resonance (NMR) spectra were recorded on a Bruker AVANCE III-400 NMR (400 MHz).

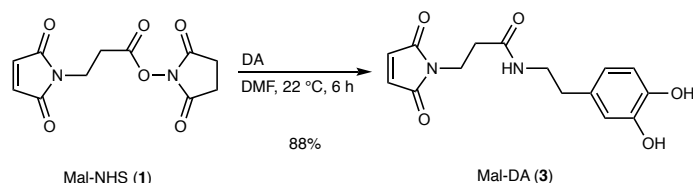

### Synthesis of Mal-DA (**3**)

Mal-NHS (270 mg, 0.1 mmol) and dopamine hydrochloride (190 mg, 0.1 mmol) were dissolved in anhydrous dimethylformamide (DMF, 2 mL) and after addition of *N,N*-diisopropylethylamine (DIEA, 130 mg, 0.1 mmol) the reaction solution was stirred under argon atmosphere at room temperature for 6 h. The resulting solution was treated with deionized water (20 mL) and extracted with EtOAc (3 x 50 mL). The combined organic phases were dried over MgSO<sub>4</sub> and after removal of all volatiles the resulting residue was purified by high performance liquid chromatography (HPLC, silica-C18, eluent gradient H<sub>2</sub>O:MeCN from 95:5 to 10:90; *t<sub>R</sub>* = 8.3 min). Yield: 260 mg (88%). MS (HRESI): *m/z* = 303.0991 (theoretical) [M-H]<sup>-</sup>, 303.0928 (experimental) [M-H]<sup>-</sup>. <sup>1</sup>H NMR (400 MHz, DMSO-*d*<sub>6</sub>) δ 7.97 (t, *J* = 5.8 Hz, 0H), 7.00 (s, 1H), 6.61 (d, *J* = 7.9 Hz, 0H), 6.55 (d, *J* = 1.6 Hz, 0H), 6.47 – 6.30 (m, 0H), 3.59 (t, *J* = 7.3 Hz, 1H), 3.12 (q, *J* = 6.9 Hz, 1H), 2.46 (t, *J* = 7.7 Hz, 1H), 2.30 (t, *J* = 7.3 Hz, 1H). <sup>13</sup>C NMR (101 MHz, DMSO) δ 170.75, 169.15, 145.03, 143.48, 134.54, 130.15, 119.13, 115.88, 115.44, 40.53, 40.15, 39.99, 39.94, 39.73, 39.52, 39.31, 39.10, 38.89, 34.55, 34.08, 34.03, 0.11.

**Supplementary Table 1 | PAC1 activation by additional PACAP variants**

| <b>Construct</b>                      | <b>-Log{EC<sub>50</sub>} -SA<sup>a</sup></b> | <b>-Log{EC<sub>50</sub>} +SA<sup>a</sup></b> |
|---------------------------------------|----------------------------------------------|----------------------------------------------|
| PACAP                                 | 10.97 ± 0.01                                 | 10.81 ± 0.01                                 |
| PACAP-10-BT                           | 10.20 ± 0.01                                 | 8.91 ± 0.02                                  |
| PACAP-10-PEG-BT <sup>b</sup>          | 9.45 ± 0.05                                  | 8.70 ± 0.01                                  |
| PACAP-20-PEG-BT <sup>b</sup>          | 10.7 ± 0.1                                   | 9.30 ± 0.02                                  |
| PACAP-10-BT (repurified) <sup>c</sup> | 10.69 ± 0.01                                 | 9.20 ± 0.04                                  |

<sup>a</sup> All values in the absence (-SA) or presence (+SA) of streptavidin were measured in duplicate using the PAC1 receptor activation bioassay and presented as mean ± SD.

<sup>b</sup> These variants contain a BT-modified glutamine residue at positions 10 or 20, each with a linker of four polyethylene glycol (PEG) monomers separating the BT moiety from the glutamine sidechain.

<sup>c</sup> PACAP-10-BT was repurified using HPLC to remove potential contaminants.

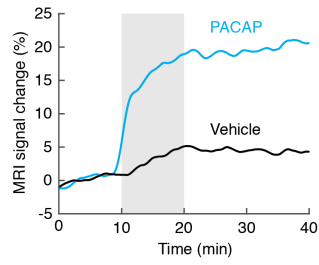

**Supplementary Figure 1 | MRI signal changes arising from intracranial PACAP delivery.** MRI time courses during delivery of 100 nM PACAP (blue) or aCSF vehicle (black) ( $n = 1$ ).

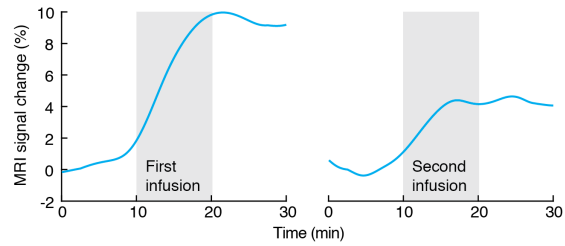

**Supplementary Figure 2 | MRI signal changes arising from tandem PACAP injections.** Time courses of MRI signal change near the injection region following injections of 1  $\mu\text{M}$  PACAP (0.1  $\mu\text{L}/\text{min}$ ) over 10 minute intervals within tandem imaging experiments, analogous to main text **Figure 1c-e**. Data presented from a single animal shows responses to PACAP in both experimental periods.

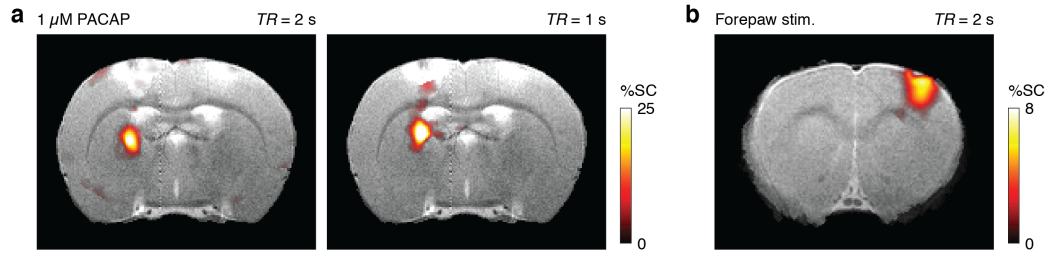

**Supplementary Figure 3 | Comparison of vasoprobe and sensory-induced MRI signal changes.** (a) Map of MRI signal change following intracranial delivery of 1  $\mu$ M of activated BT-AVATar (PACAP-10,20,32-dBT) imaged with  $TR = 2$  s (left) and  $TR = 1$  s (right), with no temporal averaging, overlaid on an anatomical scan ( $n = 1$ ). (b) Map of mean MRI signal change following forepaw stimulation in an individual animal imaged with  $TR = 2$  s and other parameters identical to those in panel a ( $n = 1$ ).

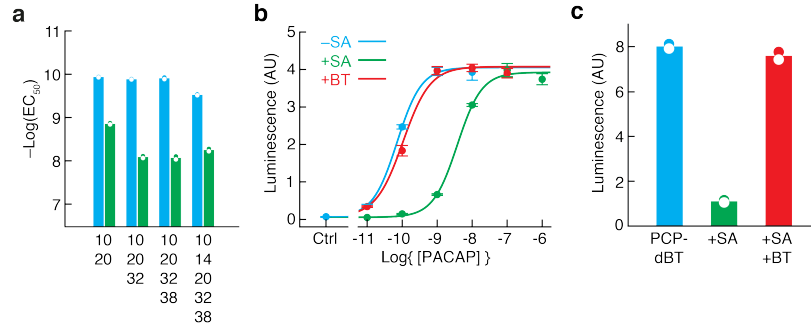

**Supplementary Figure 4 | Use of desthiobiotin for BT-AVATar construction. (a)**  $EC_{50}$  values for activation of PAC1 by PACAP derivatives modified with desthiobiotin (dBT) at the residue positions shown, in the absence (blue) and presence (green) of 200 nM SA. **(b)** Titration of PAC1 receptor activation by PACAP-10,20,32-dBT in the absence (blue) and presence (green) of 200 nM SA, and in the presence of SA plus 8  $\mu\text{M}$  biotin (BT, red). **(c)** Bioassay output in response to PACAP-10,20,32-dBT (blue) with added SA (green) and additionally added BT (red). Error bars denote SD of duplicate (panels a, c) and triplicate (panels b) measurements.

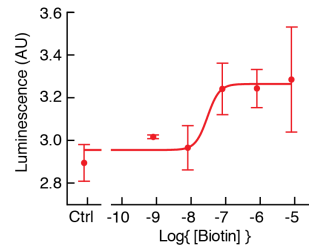

**Supplementary Figure 5 | BT-AVATar variant containing one tethered dBT.** Titration of BT-AVATar containing PACAP modified with tethered dBT only at position Y10, showing activation with  $EC_{50}$  of  $23 \pm 5$  nM. Error bars denote SD of duplicates.



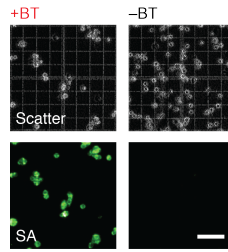

**Supplementary Figure 6 | Biotin-labeled and control cells for implantation.** Microscopy of biotin-labeled (+BT) and control-treated (-BT) HEK cells by scattered light (top) for visualization of all cells and by SA-Dylight488 (bottom) for visualization of biotin labeling. These cells are equivalent to cells implanted and imaged using BT-AVATar in the experiments of main text **Figure 4**. Scale bar = 100  $\mu$ m. Experiment was performed twice.

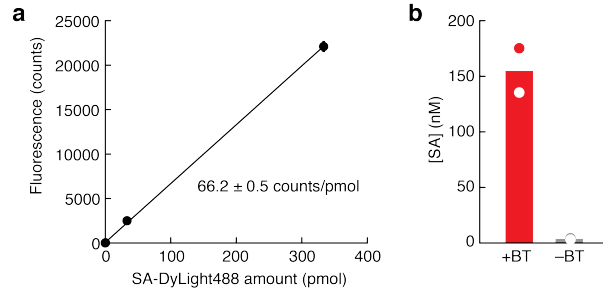

**Supplementary Figure 7 | Quantification of streptavidin binding by biotinylated cells. (a)** Calibration curve showing raw fluorescence output as a function of SA-DyLight488 quantity, yielding the calibration constant indicated. **(b)** Quantification of biotin concentration in cell pellets computed using the calibrated fluorescence assay based on SA-DyLight488 binding to biotin-labeled (+BT, red) or control-treated (-BT, gray) cells. Error bars denote SD of duplicates.

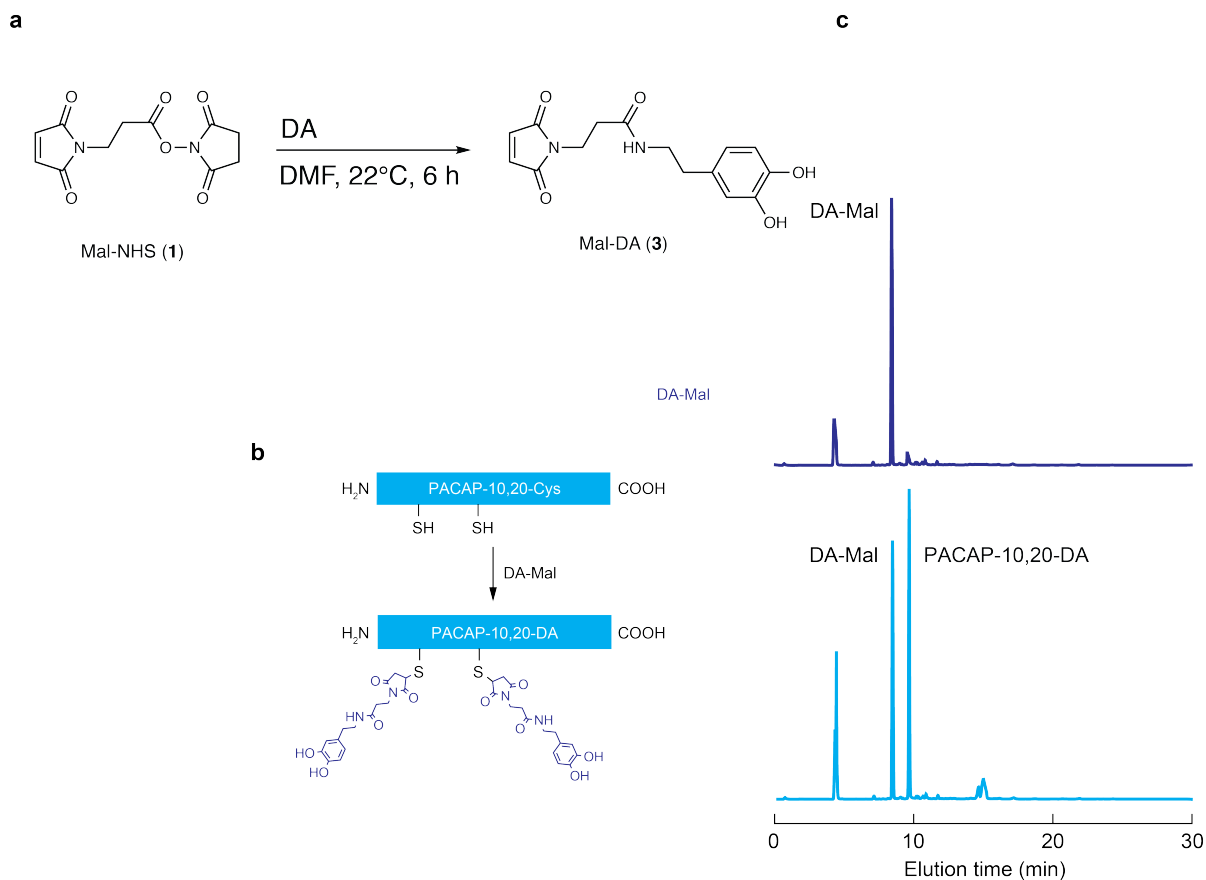

**Supplementary Figure 8 | Synthesis of PACAP-10,20-DA. (a)** Formation of the dopamine-maleimide conjugate DA-Mal by reaction of N-succinimidyl 3-maleimidopropionate (left) with dopamine in DMF. **(b)** The double cysteine mutant of PACAP, PACAP-10,20-Cys was synthesized by solid phase methods and reacted with excess DA-Mal to produce PACAP-10,20-DA as shown. **(c)** HPLC traces showing elution profiles of DA-Mal and PACAP-10,20-DA, following the reaction in **b**.

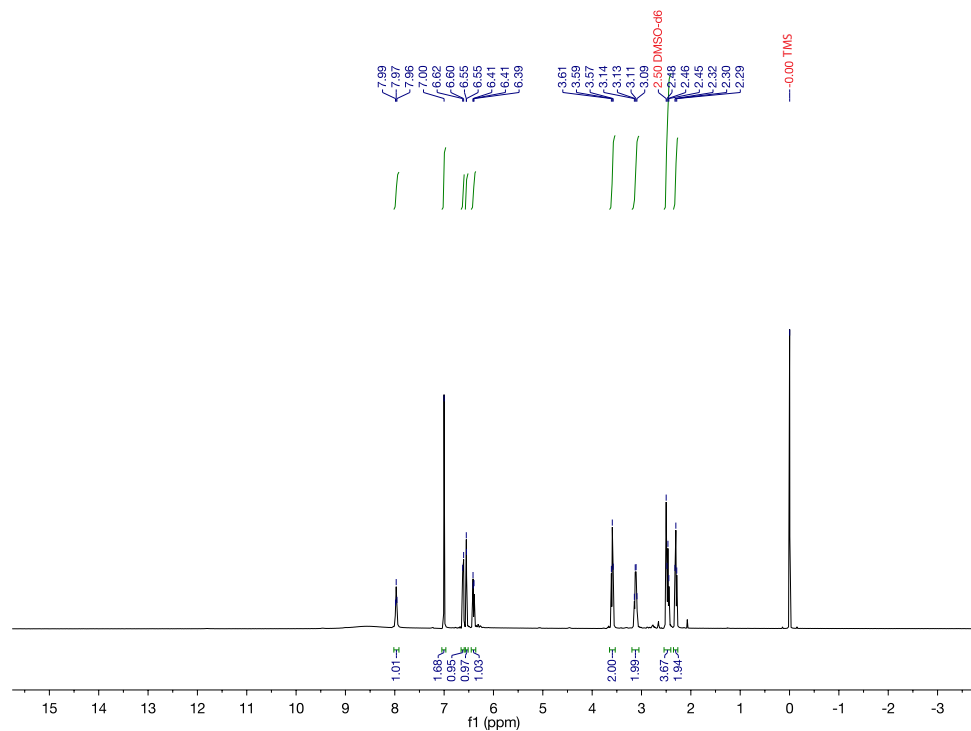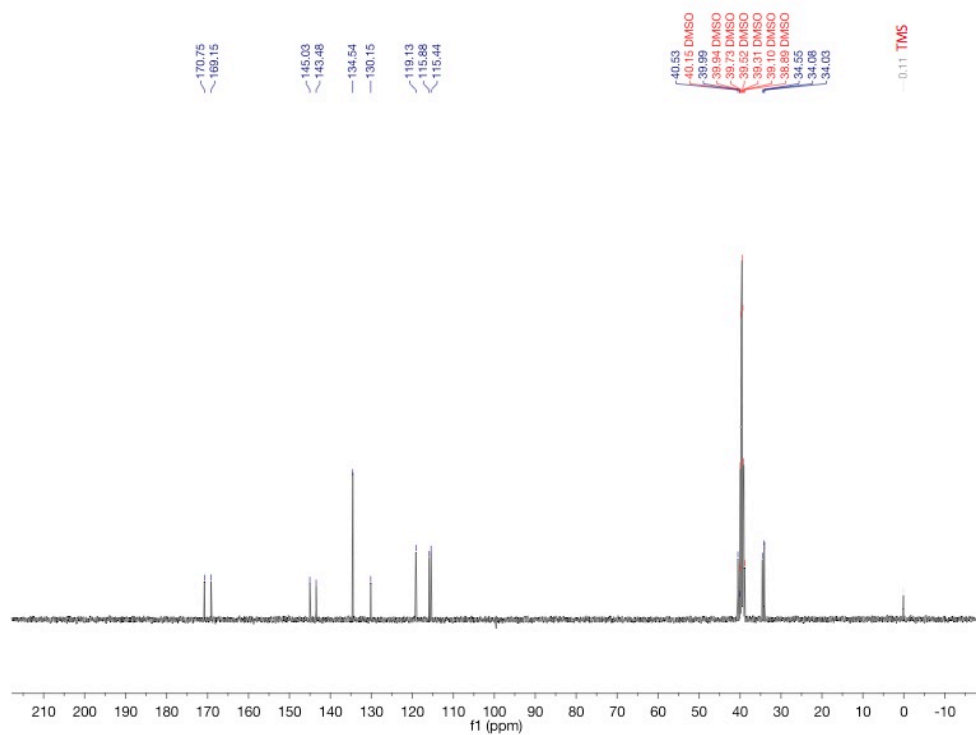

Supplementary Figure 9 | NMR spectra of DA-Mal. Top:  $^1\text{H}$ ; bottom:  $^{13}\text{C}$ .

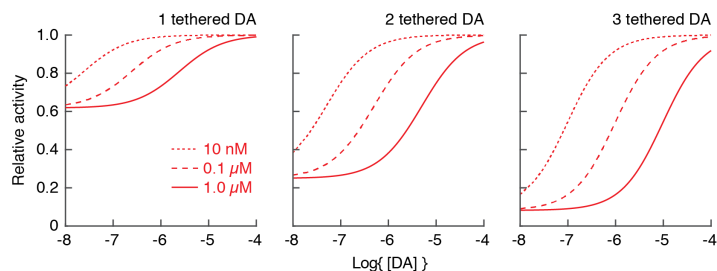

**Supplementary Figure 10 | Model of DA-AVATar design parameter effects.** Results of a simple model that shows how multiple design parameters can affect performance of DA-AVATars. An equilibrium model of probe activation assumes a PACAP moiety concentration of 10 nM modified by one (left), two (middle), or three (right) tethered DA groups. An IgG-based blocking component at a concentration equal to the number of tethered DA moieties is assumed to bind each tethered DA independently, with a dissociation constant ( $K_d$ ) of 10 nM. This binding is in competition with nondepleting binding of DA, according to varying  $K_d$  values as indicated by the key at left. Each modeled DA-AVATar is assumed to be active when no IgG domains are bound, but inactive if one or more IgG is bound. Both the assumption of independent IgG binding and all-or-nothing functionality of the probe are simplifications, but the modeled titration curves nevertheless indicate that both the  $K_d$  values and number of tethered DA moieties together influence the  $EC_{50}$  and dynamic range of probe performance.

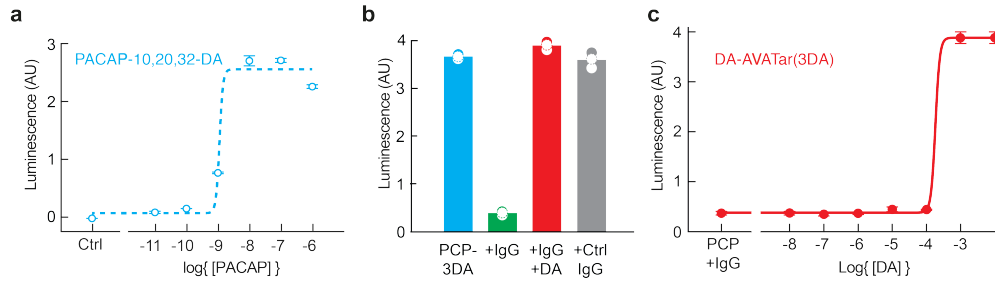

**Supplementary Figure 11 | DA-AVATar variant containing three tethered dopamine moieties.** (a) Titration of PACAP-10,20,32-DA in the PAC1 cell-based bioassay. (b) PAC1 receptor activation by 1 nM PACAP-10,20,32-DA in the absence (blue) or presence (green) of 600 nM DA-binding IgG. Activity is restored by addition of excess DA (red). Control IgG (gray) does not block PACAP activity. (c) Titration of the DA response of 1 nM DA-AVATar formed from PACAP-10,20,32-DA in the PAC1 activation assay. DA activates this DA-AVATar with an  $EC_{50}$  of  $184 \pm 7 \mu\text{M}$ . Error bars denote SD of duplicates (panel a) or triplicates (panels b, c).
